# Single-cell Transcriptomics Reveal Different Maturation Stages and Sublineages Commitment of Human Thymic Invariant Natural Killer T cells

Kristina Maas-Bauer<sup>1,2</sup>, Swati Acharya<sup>3</sup>, Jeanette Baker<sup>1</sup>, David B. Lewis<sup>4</sup>, Robert S. Negrin<sup>1,\*</sup> and Federico Simonetta<sup>1,5,6,\*</sup>

<sup>1</sup> Division of Blood and Marrow Transplantation and Cellular Therapy, Stanford University, Stanford, CA.

<sup>2</sup> Department of Hematology, Oncology, and Stem Cell Transplantation, Freiburg University Medical Center, Freiburg, Germany.

<sup>3</sup> Sean N. Parker Center for Asthma and Allergy Research, Department of Medicine, Stanford University, Stanford, CA.

<sup>4</sup> Division of Allergy, Immunology and Rheumatology, Department of Pediatrics, Stanford University School of Medicine, Stanford, CA.

<sup>5</sup> Division of Hematology, Department of Oncology, Geneva University Hospitals, Geneva, Switzerland.

<sup>6</sup> Translational Research Center for Oncohematology, Department of Pathology and Immunology, Faculty of Medicine, University of Geneva, Geneva, Switzerland.

## \* Correspondence:

Corresponding Authors: Federico Simonetta, MD, PhD ([federico.simonetta@unige.ch](mailto:federico.simonetta@unige.ch)) and Robert S. Negrin, MD ([negrs@stanford.edu](mailto:negrs@stanford.edu)), Division of Blood and Marrow Transplantation and Cellular therapy, Department of Medicine, Stanford University School of Medicine, Center for Clinical Sciences Research Building, 269 W. Campus Drive, Stanford, CA 94305 (USA).

**Keywords:** human invariant natural killer T cells; iNKT; thymic development; scRNAseq; differentiation; iNKT subsets

## 31 **Summary**

32 Invariant natural killer T (iNKT) cells are a subset of heterogenous T-cells with potent cytotoxic and  
 33 immunomodulatory properties. During thymic development, murine iNKT cells go through different  
 34 maturation stages and differentiate into distinct sublineages, namely iNKT1, iNKT2, and iNKT17  
 35 cells. To define maturation stages and to assess sublineage commitment of human iNKT cells during  
 36 thymic development, we performed single-cell RNA sequencing analysis on human thymic iNKT  
 37 cells. We show that these iNKT cells displayed heterogeneity and unsupervised analysis identified  
 38 two clusters: one with an immature profile with high expression of genes that are important for iNKT  
 39 cell development and enriched in cells expressing an iNKT2 signature, whereas a second cluster  
 40 displayed a mature, terminally differentiated profile resembling murine iNKT1 cells. Trajectory  
 41 analysis suggested an ontological relationship between the two clusters. Our work provides the first  
 42 single cell transcriptomic analysis of thymic human iNKT cells offering new insights into their  
 43 developmental process in humans.

44

## 45 Introduction

46 Invariant Natural Killer T (iNKT) cells are a rare subset of innate lymphocytes representing less than  
47 1% of the total lymphocyte population both in humans and mice. iNKT cells express a semi-invariant  
48 TCR, consisting of a V $\alpha$ 14J $\alpha$ 18 chain paired with a limited selection of beta chains in mice and  
49 V $\alpha$ 24J $\alpha$ 18 typically pairing with V $\beta$ 11 in humans, that recognize glycolipids presented in the context  
50 of the non-polymorphic, MHC-like molecule CD1d (Kawano et al, 1997; Lantz & Bendelac, 1994).  
51 Upon stimulation, iNKT cells can promptly release a wide range of cytokines, allowing to iNKT cells  
52 to exert a spectrum of pleiotropic functions, ranging from antitumor effects to immune-regulatory  
53 activity (Crosby & Kronenberg, 2018; Matsuda et al, 2008).

54 Traditionally, thymic development of murine iNKT cells has been defined by different maturation  
55 stages based on the surface expression of CD24, CD44 and NK1.1: CD24<sup>hi</sup>CD44<sup>lo</sup>, NK1.1<sup>lo</sup> immature  
56 precursor iNKT cells (iNKT0 or iNKTp; (Benlagha et al, 2002); CD24<sup>lo</sup>CD44<sup>lo</sup>, NK1.1<sup>lo</sup> stage 1  
57 iNKT cells; CD24<sup>lo</sup>CD44<sup>hi</sup>, NK1.1<sup>lo</sup> stage 2 iNKT cells; CD24<sup>lo</sup>CD44<sup>hi</sup>, NK1.1<sup>hi</sup> stage 3 iNKT cells.  
58 Interestingly, these maturation stages have been associated with different functional properties with  
59 stage 1 and 2 iNKT cells producing interleukin 4 (IL-4) and interleukin10 (IL-10), stage 3 iNKT cells  
60 producing interferon- $\gamma$  (IFN- $\gamma$ ) and having limited proliferation potential compared to stage 1 and 2  
61 iNKT cells (Coquet et al, 2008; Gadue & Stein, 2002; Pellicci et al, 2002). Such model has been  
62 challenged by recent reports based on single cell genomic analyses identifying the coexistence of  
63 different maturation iNKT stages in the murine thymus and also suggesting that populations with  
64 mixed characteristics exist (Harsha Krovi et al, 2020).

65 Partly opposed to the theory of different maturation stages, several studies indicated the existence of  
66 at least three, terminally differentiated, murine iNKT sublineages, namely Th-1 like iNKT (iNKT1),  
67 Th-2 like iNKT (iNKT2) and Th-17 like iNKT (iNKT17) cells (Engel et al, 2016; Lee et al, 2013).  
68 These subsets are characterized by the differential expression of the transcription factors  
69 promyelocytic leukaemia zinc finger (PLZF), GATA Binding Protein 3 (GATA3), T-bet and RAR-  
70 related orphan receptor gamma (ROR $\gamma$ t) (iNKT1: PLZF<sup>lo</sup>, T-bet<sup>+</sup>, iNKT2: PLZF<sup>hi</sup> GATA3<sup>hi</sup>,  
71 iNKT17: PLZF<sup>int</sup>ROR $\gamma$ t<sup>+</sup>, and PLZF<sup>lo</sup>, T-bet<sup>+</sup>) (Engel et al, 2016; Lee et al, 2013), produce a unique  
72 cytokine profile (Lee et al, 2013) and have special distribution in tissues (Lee et al, 2015). We  
73 recently demonstrated that distinct iNKT sublineages exert different functions, iNKT2 and iNKT17  
74 displaying immunoregulatory properties while iNKT1 exerting the strongest cytotoxic activity  
75 (Maas-Bauer et al, 2021). Importantly, in contrast to what observed in conventional T cells whose  
76 Th1, Th2 or Th17 lineage commitment takes place upon antigen encounter in the periphery, iNKT  
77 cell sublineages differentiation already takes place at the thymic level (Engel et al, 2016; Lee et al,  
78 2013). Importantly, a recent single-cell report on thymic iNKT cells of pre-pubertal pigs showed big  
79 differences between murine and porcine iNKT cells (Gu et al, 2022). In this study porcine iNKT cells  
80 were unexpectedly homogeneous, with 97% of cells expressing an iNKT2 genotype.

81 Despite the progresses in the understanding of animalistic iNKT cell development and  
82 differentiation, little is still known about human iNKT cell thymic development. Studies investigating  
83 maturation processes of human iNKT cells based on phenotypic analysis have shown that, similarly  
84 to murine iNKT cells, the predominant iNKT cell population in neonatal human thymus are  
85 CD4<sup>+</sup>CD161<sup>-</sup> iNKT cells, whereas CD4<sup>+</sup>CD161<sup>+</sup> iNKT cells accumulate with age (Berzins et al,  
86 2005; Sandberg et al, 2004). Whether these subsets of human thymic iNKT cells correspond to  
87 distinct maturation stages is still unclear. Moreover, it is still unknown whether human iNKT cells  
88 commit at the thymic level toward any of the sublineages profiles reported in mice.

## Results

### Single-cell RNA sequencing identifies two different iNKT cell clusters corresponding to distinct developmental stages in the human thymus

We performed single cell RNA-sequencing (scRNA-seq) on human thymic iNKT cells FACS-sorted from thymi from 3 newborn/infant donors (Figure 1A). After removing doublets (>2500 gene counts), cells with lowest (<200) gene counts and cells with high (>5%) mitochondrial gene content, 341 cells were retained for downstream analysis. Unsupervised Uniform Manifold Approximation and Projection (UMAP) analysis segregated human thymic iNKT cells into 2 clearly defined clusters: cluster 0 and cluster 1 (Figure 1B). Such distribution was conserved across the three samples originating from the three different donors (Supplemental Figure 1). Differential expression analysis revealed 259 differentially expressed genes between the two clusters. Among the 20 most differentially expressed genes (Figure 1C), iNKT cells in cluster 0 were enriched for genes previously reported in mice to be associated with development of iNKT cell precursors, including SRY-Box Transcription Factor 4 (SOX4; (Malhotra et al, 2018)), lymphoid enhancing-factor 1 (LEF1; (Berga-Bolaños et al, 2015; Carr et al, 2015)), special AT-rich sequence-binding protein-1 (SATB1; (Kakugawa et al, 2017)), and Integral Membrane Protein 2A (ITM2A; (Baranek et al, 2020; Harsha Krovi et al, 2020)). In particular SOX4, encoding the transcription factor important for the development of iNKT cells (Malhotra et al, 2018), was preferentially expressed in cluster 0 and was barely detectable in cluster 1 (Figure 1D). Conversely, cells in cluster 1 expressed genes associated with iNKT full differentiation (Killer Cell Lectin Like Receptor B1 (KLRB1), encoding the surface molecule CD161; Figure 1E). Based on these data we hypothesized that the two clusters could correspond to two different stages of human iNKT development. To address this hypothesis, we performed a pseudotime analysis with cluster 0 defined as the root. This analysis revealed a cell transition trajectory from cluster 0 to cluster 1 (Figure 2A). Along such trajectory we observed a progressive downregulation of the genes encoding the transcription factors LEF1, SATB1 and SOX4 (Figure 1B). This was mirrored by the upregulation of genes known to be involved in iNKT terminal differentiation (KLRB1, (Baranek et al, 2020; Pellicci et al, 2002) and production of cytotoxic molecules (GZMA). Collectively, these data demonstrate the heterogeneity of human thymic iNKT cells and point to the existence of at least two different iNKT maturation stages at the thymic level.

### Human iNKT cells with iNKT1 and iNKT2 gene signature are present at the thymic level

Murine iNKT cells have been shown to differentiate at the thymic level into three sublineages, namely iNKT1, iNKT2, and iNKT17 cells, displaying different transcriptomic (Baranek et al, 2020; Engel et al, 2016), epigenomic (Engel et al, 2016) and functional (Maas-Bauer et al, 2021) characteristics. We therefore investigated whether human thymic iNKT cells also displayed signs of sublineage commitment at the thymic level. To this aim, we generated subset-specific gene signatures for iNKT1, iNKT2 and iNKT17 based on human gene orthologues of genes we previously identified in single cell transcriptomic analysis of murine thymic iNKT cells (Maas-Bauer et al, 2021). The composite expression score of iNKT sublineages specific gene sets was calculated using the Seurat's AddModuleScore function. Our analysis detected an enrichment in iNKT1-signature expressing cells in cluster 1 whereas these cells were barely detectable cluster 0 cells (Figure 3, upper panels). Conversely, cells in cluster 0 displayed an enrichment for iNKT2-signature expressing cells, although such signature was also detectable in some cluster 1 cells (Figure 3, middle panel). We did not identify any clear enrichment of iNKT17-signature expressing cells in either cluster 0 or cluster 1 (Figure 3, bottom panel). To further validate the iNKT-sublineages signatures we generated, we next assessed them on publicly available scRNA-seq data of iNKT cells isolated from human peripheral

blood (Erkers et al, 2020). Our analysis clearly identified a cluster of iNKT cells displaying an enrichment in iNKT1-signature genes (Supplemental Figure 2A,B) while we observed the presence of some cells enriched in iNKT2- and iNKT17-signature genes not associated with any specific cluster. In conclusion, our analysis revealed the existence of a population of human iNKT cells committed toward an iNKT1-like, and at a lesser extent iNKT2-like, differentiation during thymic development.

## Discussion

In this study, we used single-cell transcriptomics to analyze human thymic iNKT cells maturation processes and to investigate if, similarly to their murine counterpart, human iNKT cells undergo sublineage differentiation at the thymic level. Our analysis revealed the trajectory of human iNKT cells development through two different maturation stages. More importantly, we provide for the first time evidence that human iNKT cells commit to an iNKT1-sublineage differentiation already at the thymic level.

Unsupervised clustering revealed two clusters of human thymic iNKT cells that mainly differed for the expression of genes encoding for proteins involved in iNKT development and differentiation. The RNA for the transcription factors SOX4 and LEF1 and for the proteins ITM2A and SATB1 was more highly expressed in Cluster 0. SOX4 and LEF1 have been shown to be important transcription factors for iNKT cell development (Malhotra et al, 2018). LEF1, for example, is a crucial transcription factor for iNKT cell proliferation (Berga-Bolaños et al, 2015; Carr et al, 2015) and two extensive studies of murine thymic iNKT cells showed lately that LEF1 and SOX4 are highly upregulated in NKT0 cells (Baranek et al, 2020; Harsha Krovi et al, 2020). In line with our findings, ITM2a was also highly upregulated in the NKT0 population in these analyses (Baranek et al, 2020; Harsha Krovi et al, 2020). ITM2A is a target gene of GATA-3, a transcription factor involved in differentiation of murine iNKT cells and especially for the production of T<sub>H</sub>2 cytokines by iNKT cells (Kim et al, 2006). Moreover, SATB1, a protein involved in the regulation of iNKT cell development in mice (Kakugawa et al, 2017), was also upregulated in cluster 0 cells. Regarding cluster 1, we found that genes encoding for cytotoxic molecules like GZMA (encoding for granzyme A) were enriched. Moreover, the gene encoding KLRB1, a molecule associated with effector function in several lymphocytic subset (Takahashi et al, 2006) was also expressed at higher levels in cluster 1 cells compared to cells in cluster 0. Cluster 1 cells expressed higher levels of CD69 transcript, encoding a surface molecule associated with activated state in T cells (Sancho et al, 2005) and augmented cytotoxicity in NK cells (Clausen et al, 2003; Moretta et al, 1991). Overall, the gene program of cells in cluster 0 is reminiscent of murine iNKT0/p cells with upregulation of genes involved in iNKT cell development and proliferation, whereas cells in cluster 1 resembled murine mature iNKT cells with an upregulation of molecules responsible for effector function and associated with an activated phenotype. Trajectory analysis with pseudo-time of the same population (Figure 2), revealed a dynamic process of cells in cluster 0 maturing to cells in cluster 1 (Figure 2B), resulting in a cytotoxic phenotype of the differentiated cells. Taken these findings together, we suggest that different maturation stages of iNKT cells exist in human thymus. These findings are in line with previously reported murine data showing that different maturation stages of iNKT cells are present at the thymic level (Baranek et al, 2020; Harsha Krovi et al, 2020).

We previously showed that murine thymic iNKT1, iNKT2 and iNKT17 cells not only differ in their transcriptomic and epigenetic profile but also exert different functions in vitro and in vivo (Maas-Bauer et al, 2021). To investigate whether human iNKT cells also possess properties attributed to murine iNKT1, iNKT2 and iNKT17 cells, we evaluated the enrichment for human gene orthologues to the ones we previously reported for identification of iNKT-sublineages in mice (Maas-Bauer et al, 2021). We found that cells in cluster 1 are enriched for cells that resemble murine iNKT1 cells, whereas cells in cluster 0 are enriched for cells with an iNKT2 signature, although, at a lesser extent, iNKT2-like cells were also found in cluster 1. This heterogeneity are in line with recent data suggesting that iNKT2 cells are not terminally differentiated and consist of several subpopulations that differ in their maturation grade. During maturation some iNKT2 subsets (iNKT2b) acquire markers usually attributed to iNKT1 cells (Baranek et al, 2020; Harsha Krovi et al, 2020).



Interestingly, iNKT cells with an iNKT17 profile did not cluster in one specific region in the UMAP analysis (Figure 3). Thus, we cannot conclude that iNKT17 cells also exist in human thymus. As human iNKT cells that express ROR $\gamma$ t and IL-17 have been described in peripheral blood (Venken et al, 2019), it is possible that they either differentiate in the periphery (Wang & Hogquist, 2018) or emigrate directly after differentiation. In addition to this data, several studies suggest that CD69 expression of iNKT1 cells is responsible for thymic retention (Baranek et al, 2020; Nakayama et al, 2002) and that only iNKT2, iNKT17 and some iNKT1 subsets leave the thymus (Baranek et al, 2020). The iNKT1-like cells in our analysis expressed CD69, which might explain the relatively big proportion of these cells in human thymus.

Before iNKT subsets in mice were investigated, data suggested that iNKT cells are defined by their maturation stage (Pellicci et al, 2002; Watarai et al, 2012). Later iNKT1, iNKT2 and iNKT17 cells were identified as fully differentiated cell populations (Hogquist & Georgiev, 2020; Lee et al, 2013)). More recent reports performed scRNA-seq and showed with trajectory analysis that iNKT cells in the thymus differ in their maturation stage (Baranek et al, 2020; Harsha Krovi et al, 2020). Moreover, they showed that iNKT1 and iNKT2 cells consist of different subgroups and suggest a plasticity at least in iNKT0/p and in the more immature subgroups of iNKT2 cells (Baranek et al, 2020; Harsha Krovi et al, 2020). Thus, owing to these studies it is now possible to reconcile the discovery of iNKT1, iNKT2 and iNKT17 subsets with the knowledge of different maturation stages of iNKT cells in the thymus, suggesting that iNKT2 cells display immature characteristics compared to iNKT1 and iNKT17 cells and probably function as a precursor for these subsets (Baranek et al, 2020; Harsha Krovi et al, 2020). Moreover, a recent study of thymic porcine iNKT cells also demonstrated, that some iNKT2 cell subsets of pre-pubertal pigs had immature properties with an upregulation of LEF1 and SATB1 that are typical for immature iNKT cells (Gu et al, 2022). Intriguingly, these data are also in line with our findings that cells with an iNKT2 signature are present in the human thymus, yet appear with immature properties that also resemble murine iNKT0/p cells. Importantly, these findings are also in line with a study of thymic porcine iNKT cells demonstrating, that some iNKT2 of pre-pubertal pigs had immature properties and upregulated LEF1 and SATB1 that are typical for immature iNKT cells (Quelle).

As the composition of iNKT cells is altered with aging (Papadogianni et al, 2020) and might differ among individuals, our analysis represents a snapshot of iNKT cell distribution at very young age. Furthermore, the number of cells in our analysis is limited due to the paucity of iNKT cells in human thymus and the difficulties to access vital thymic tissue of older individuals. However, to our knowledge this is the first study investigating the transcriptomic differences of human thymic iNKT cells, with respect to iNKT maturation stages and cell subsets. Moreover, our data are in line with recent murine studies showing that iNKT cells with iNKT2 properties have immature characteristics and can give rise to terminally differentiated iNKT1 cells. Our work is a first step to a better understanding of human iNKT cell heterogeneity at the thymic level. Future studies will be needed to explore human iNKT subsets at different ages as well as in peripheral organs to decipher their function.

## 227 **Acknowledgments**

228 The authors thank Dr. Dhananjay Wagh at the Stanford Functional Genomics Facility for his  
229 excellent technical assistance in the genomics analysis

## 230 **Funding**

231 This work was supported by grants from the National Institutes of Health (NIH) (National Heart,  
232 Lung, and Blood Institute, P01 HL075462, and the National Cancer Institute, R01 CA23158201,  
233 R.S.N.; the German Cancer Aid (Mildred Scheel Postdoctoral Fellowship, K.M.-B.) the Else-Kröner-  
234 Fresenius-Stiftung (K.M.-B.) and the Berta-Ottenstein Program (Faculty of Medicine, Freiburg  
235 University, K.M.-B.), the Swiss Cancer League (BIL KLS 3806-02-2016, F.S.), the American  
236 Society for Blood and Marrow Transplantation (New Investigator Award 2018, F.S.), the Geneva  
237 Cancer League LGC 20 11 (F.S.), the ChooseLife Foundation (F.S.) and the Dubois-Ferriere-Dinu-  
238 Lipatti Foundation (F.S). Flow cytometry analysis for this project was conducted on instruments in  
239 the Stanford Shared FACS Facility purchased by using an NIH S10 Shared Instrumentation Grant  
240 (S10RR027431-01). Sequencing was performed on instruments in the Stanford Functional Genomics  
241 Facility, including the Illumina HiSeq 4000 purchased by using an NIH S10 Shared Instrumentation  
242 Grant (S10OD018220).

## 243 **Author Contributions**

244 F.S., K.M.-B., and R.S.N. conceived and designed the study; K.M.-B., S.A., F.S., performed the  
245 experiments; F.S. analyzed the data; F.S., K.M.-B., and R.S.N. contributed to the interpretation of  
246 results; K.M.-B., S.A., F.S., and R.S.N. wrote the manuscript; S.A, J.B and D.B.L provided essential  
247 reagents and methods; F.S. and R.S.N. supervised the research. All authors read and approved the  
248 submitted version of the manuscript.

## 249 **Declaration of Interest**

250 The authors declare no competing interests.

251



## Figure legends

**FIGURE 1.** Single-cell transcriptomic analysis reveals heterogeneity of human thymic iNKT cells. **(A)** Schematic representation of the experimental pipeline. **(B)** Uniform Manifold Approximation and Projection (UMAP) plot of scRNA-seq data showing distinct clusters of human thymic iNKT cells. **(C)** Single-cell heatmap representing the 10 most highly differentially expressed genes in human thymic iNKT cell clusters. Expression for each gene is scaled (z-scored) across single cells. **(D-E)** Relative expression and normalized counts of SOX4 **(D)** and KLRB1 **(E)** in human thymic iNKT cell clusters.

**FIGURE 2.** Pseudotime analysis indicates ontological relationship between human thymic iNKT cell clusters. **(A)** UMAP plot of scRNA-seq data colored by pseudotime. **(B)** Single genes normalized expression levels across the pseudotime trajectory. Cells are colored by pseudotime.

**FIGURE 3.** Identification of human thymic iNKT cells expressing an iNKT1 and iNKT2 signature. Relative expression and normalized expression of iNKT1 (upper panels), iNKT2 (middle panels) and iNKT17 (lower panels) signatures. Color intensity represents the composite expression score of iNKT sublineage-specific gene sets as calculated using the Seurat's AddModuleScore function.

## 268 **Star Methods**

## 269 **Resource Availability**

### 270 Lead Contact

271 Further information and requests for resources and reagents should be directed to and will be fulfilled  
272 by the lead contact, Federico Simonetta (Federico.Simonetta@unige.ch).

### 273 Materials availability

274 This study did not generate new unique reagents.

### 275 Data and code availability

276 Single-cell RNA-seq data have been deposited at GEO and will be publicly available as of the date of  
277 publication. Accession numbers are listed in the key resources table. DOIs are listed in the key  
278 resources table. Any additional information required to reanalyze the data reported in this paper is  
279 available from the lead contact upon request.

## 280 **Experimental model and subject details**

### 281 Human samples

282 Thymi were obtained after being removed from 3 newborn/infant donors undergoing cardiac surgery  
283 between 5 days and 13 months of age for cardiac diseases without evidence of immunological  
284 diseases. The analysis of human thymus samples obtained as surgical waste was reviewed and  
285 approved by Stanford University, Institutional Review Board (IRB Protocol #16877; directors Drs.  
286 David B. Lewis and Swati Acharya, Pediatric Cardiovascular Surgery, Stanford Children's Health).  
287 Single cell suspensions were obtained by mechanical dissociation, washed, cryopreserved in fetal calf  
288 serum and 10% DMSO and stored in liquid nitrogen until use.

## 289 **Method Details**

### 290 Preparation of thymic iNKT cells

291 Thymocytes were thawed at room temperature in RPMI 1640 containing FCS 30%, Penicillin-  
292 Streptomycin 1%, DNase I (10 ug/ml, Sigma), and heparin 20 U/ml. After washing, FACS surface  
293 staining was performed on ice, after FC blockage, using the following antibodies: Vα24 (FITC,  
294 Beckman Coulter), Vβ11 (APC, Beckman Coulter), CD3 (BV605, Biolegend), CD14 (APC Cy7,  
295 Biolegend), CD19 (APC Cy7, Biolegend), LIVE/DEAD™ Fixable Aqua Dead Cell Stain Kit  
296 (Invitrogen). CD3+, Vα24+, Vβ11+, CD14-, CD19- live cells were FACS-sorted on a FACS Aria-III  
297 (BD Biosciences).

### 298 Single cell RNA sequencing

299 Single-cell libraries were generated from FACS-sorted human thymic iNKT cells using the  
300 Chromium Controller Single-Cell Instrument and Chromium Single Cell 3' Library & Gel Bead Kit  
301 v2 (10x Genomics). Sample demultiplexing, barcode processing, alignment to the GRCh38 assembly  
302 of the human genome, and single-cell 3' gene counting were performed using the Cell Ranger Suite  
303 version 2.1. The gene-barcode matrix contained 397 cells, with 383784 mean reads per cell and 1099  
304 (984-1203) median genes per cell. Cells with unique gene counts <200 or >2500, as well as cells with

>5% of mitochondrial genes were excluded from the analysis. scRNA-seq analysis was performed using the Seurat R package, version 4. Pseudotime analysis was performed using the Monocle3 package. Previously published scRNA-seq datasets from human iNKT cells recovered from the peripheral blood (PRJNA563899, PRJNA565590; (Erkers et al, 2020)) were analyzed using the same pipeline.

## Key resources table

| REAGENT or RESOURCE                               | SOURCE                           | IDENTIFIER |
|---------------------------------------------------|----------------------------------|------------|
| <b>Antibodies</b>                                 |                                  |            |
| FITC-labeled TCR Vα24                             | Beckman Coulter                  | IM1589     |
| APC-labeled TCR Vβ11                              | Beckman Coulter                  | A66905     |
| BV605-labeled anti-human CD3 Antibody             | Biolegend                        | 31732      |
| APC Cy7-labeled anti-human CD14 Antibody          | Biolegend                        | 398707     |
| APC Cy7-labeled anti-human CD19 Antibody          | Biolegend                        | 302217     |
| LIVE/DEAD™ Fixable Aqua Dead Cell Stain Kit       | Invitrogen                       | L34957     |
| <b>Biological samples</b>                         |                                  |            |
| Human thymic samples                              | Pediatric Cardiovascular Surgery | n/a        |
| <b>Critical commercial assays</b>                 |                                  |            |
| Chromium Single Cell 3' Library & Gel Bead Kit v2 | 10x Genomics                     | PN-120237  |
| Chromium Controller Single-Cell Instrument        | 10x Genomics                     |            |
|                                                   |                                  |            |
|                                                   |                                  |            |
|                                                   |                                  |            |
| <b>Deposited data</b>                             |                                  |            |

|                                      |                                             |                                                                                                                   |
|--------------------------------------|---------------------------------------------|-------------------------------------------------------------------------------------------------------------------|
| <b>Raw data</b>                      | <b>This paper</b>                           | Single-cell RNA-seq data have been deposited at GEO and will be publicly available as of the date of publication. |
| Human iNKT cells in peripheral blood | (Erkers et al, 2020)                        | NCBI Sequence Read Archive: PRJNA563899, PRJNA565590                                                              |
| <b>Software and algorithms</b>       |                                             |                                                                                                                   |
| <b>Cell Ranger Suite version 2.1</b> | <b>10x Genomics</b>                         |                                                                                                                   |
| <b>Seurat R package, version 4</b>   | <b>Stuart et al, 2019</b>                   | <a href="https://satijalab.org/seurat/">https://satijalab.org/seurat/</a>                                         |
| Monocle3                             | Trapnell et al., Nature Biotechnology, 2014 | <a href="https://cole-trapnell-lab.github.io/monocle3/">https://cole-trapnell-lab.github.io/monocle3/</a>         |
|                                      |                                             |                                                                                                                   |
|                                      |                                             |                                                                                                                   |

311

## 312 **Supplemental figure legends**

313 **SUPPLEMENTAL FIGURE 1.** Reproducibility of single-cell transcriptomic analysis of human  
314 thymic iNKT across different donors. UMAP plots of scRNA-seq analysis of human thymic iNKT  
315 cells splitted by different donor source.

316 **SUPPLEMENTAL FIGURE 2.** iNKT-sublineage specific signatures expression in peripheral blood  
317 human iNKT cells. **(A)** UMAP) plot of publicly available scRNA-seq data (Enkers et al., Blood  
318 2020) showing distinct clusters of human iNKT cells from peripheral blood. **(B)** Relative expression  
319 and normalized expression of iNKT1 (upper panels), iNKT2 (middle panels) and iNKT17 (lower  
320 panels) signatures. Color intensity represents the composite expression score of iNKT sublineage-  
321 specific gene sets as calculated using the Seurat's AddModuleScore function.

322

323

## References

- Baranek, T., Lebrigand, K., de Amat Herbozo, C., Gonzalez, L., Bogard, G., Dietrich, C., Magnone, V., Boisseau, C., Jouan, Y., Trottein, F., Si-Tahar, M., Leite-de-Moraes, M., Mallevaey, T. & Paget, C. (2020) High Dimensional Single-Cell Analysis Reveals iNKT Cell Developmental Trajectories and Effector Fate Decision. *Cell Rep*, 32(10), 108116.
- Benlagha, K., Kyin, T., Beavis, A., Teyton, L. & Bendelac, A. (2002) A thymic precursor to the NK T cell lineage. *Science*, 296(5567), 553-5.
- Berga-Bolaños, R., Zhu, W. S., Steinke, F. C., Xue, H. H. & Sen, J. M. (2015) Cell-autonomous requirement for TCF1 and LEF1 in the development of Natural Killer T cells. *Mol Immunol*, 68(2 Pt B), 484-9.
- Berzins, S. P., Cochrane, A. D., Pellicci, D. G., Smyth, M. J. & Godfrey, D. I. (2005) Limited correlation between human thymus and blood NKT cell content revealed by an ontogeny study of paired tissue samples. *Eur J Immunol*, 35(5), 1399-407.
- Carr, T., Krishnamoorthy, V., Yu, S., Xue, H. H., Kee, B. L. & Verykokakis, M. (2015) The transcription factor lymphoid enhancer factor 1 controls invariant natural killer T cell expansion and Th2-type effector differentiation. *J Exp Med*, 212(5), 793-807.
- Clausen, J., Vergeiner, B., Enk, M., Petzer, A. L., Gastl, G. & Gunsilius, E. (2003) Functional significance of the activation-associated receptors CD25 and CD69 on human NK-cells and NK-like T-cells. *Immunobiology*, 207(2), 85-93.
- Coquet, J. M., Chakravarti, S., Kyparissoudis, K., McNab, F. W., Pitt, L. A., McKenzie, B. S., Berzins, S. P., Smyth, M. J. & Godfrey, D. I. (2008) Diverse cytokine production by NKT cell subsets and identification of an IL-17-producing CD4-NK1.1- NKT cell population. *Proc Natl Acad Sci U S A*, 105(32), 11287-92.
- Crosby, C. M. & Kronenberg, M. (2018) Tissue-specific functions of invariant natural killer T cells. *Nat Rev Immunol*, 18(9), 559-574.
- Engel, I., Seumois, G., Chavez, L., Samaniego-Castruita, D., White, B., Chawla, A., Mock, D., Vijayanand, P. & Kronenberg, M. (2016) Innate-like functions of natural killer T cell subsets result from highly divergent gene programs. *Nat Immunol*, 17(6), 728-39.
- Erkers, T., Xie, B. J., Kenyon, L. J., Smith, B., Rieck, M., Jensen, K. P., Ji, X., Basina, M., Strober, S., Negrin, R. S., Maecker, H. T. & Meyer, E. H. (2020) High-parametric evaluation of human invariant natural killer T cells to delineate heterogeneity in allo- and autoimmunity. *Blood*, 135(11), 814-825.
- Gadue, P. & Stein, P. L. (2002) NK T cell precursors exhibit differential cytokine regulation and require Itk for efficient maturation. *J Immunol*, 169(5), 2397-406.
- Gu, W., Madrid, D. M. C., Joyce, S. & Driver, J. P. (2022) A single-cell analysis of thymopoiesis and thymic iNKT cell development in pigs. *Cell Rep*, 40(1), 111050.
- Harsha Krovi, S., Zhang, J., Michaels-Foster, M. J., Brunetti, T., Loh, L., Scott-Browne, J. & Gapin, L. (2020) Thymic iNKT single cell analyses unmask the common developmental program of mouse innate T cells. *Nat Commun*, 11(1), 6238.
- Hogquist, K. & Georgiev, H. (2020) Recent advances in iNKT cell development. *F1000Res*, 9.



364 Kakugawa, K., Kojo, S., Tanaka, H., Seo, W., Endo, T. A., Kitagawa, Y., Muroi, S., Tenno, M.,  
365 Yasmin, N., Kohwi, Y., Sakaguchi, S., Kowhi-Shigematsu, T. & Taniuchi, I. (2017) Essential Roles  
366 of SATB1 in Specifying T Lymphocyte Subsets. *Cell Rep*, 19(6), 1176-1188.

367 Kawano, T., Cui, J., Koezuka, Y., Toura, I., Kaneko, Y., Motoki, K., Ueno, H., Nakagawa, R., Sato,  
368 H., Kondo, E., Koseki, H. & Taniguchi, M. (1997) CD1d-restricted and TCR-mediated activation of  
369 valpha14 NKT cells by glycosylceramides. *Science*, 278(5343), 1626-9.

370 Kim, P. J., Pai, S. Y., Brigl, M., Besra, G. S., Gumperz, J. & Ho, I. C. (2006) GATA-3 regulates the  
371 development and function of invariant NKT cells. *J Immunol*, 177(10), 6650-9.

372 Lantz, O. & Bendelac, A. (1994) An invariant T cell receptor alpha chain is used by a unique subset  
373 of major histocompatibility complex class I-specific CD4+ and CD4-8- T cells in mice and humans. *J*  
374 *Exp Med*, 180(3), 1097-106.

375 Lee, Y. J., Holzapfel, K. L., Zhu, J., Jameson, S. C. & Hogquist, K. A. (2013) Steady-state  
376 production of IL-4 modulates immunity in mouse strains and is determined by lineage diversity of  
377 iNKT cells. *Nat Immunol*, 14(11), 1146-54.

378 Lee, Y. J., Wang, H., Starrett, G. J., Phuong, V., Jameson, S. C. & Hogquist, K. A. (2015) Tissue-  
379 Specific Distribution of iNKT Cells Impacts Their Cytokine Response. *Immunity*, 43(3), 566-78.

380 Maas-Bauer, K., Lohmeyer, J. K., Hirai, T., Ramos, T. L., Fazal, F. M., Litzenburger, U. M., Yost,  
381 K. E., Ribado, J. V., Kambham, N., Wenokur, A. S., Lin, P. Y., Alvarez, M., Mavers, M., Baker, J.,  
382 Bhatt, A. S., Chang, H. Y., Simonetta, F. & Negrin, R. S. (2021) Invariant natural killer T-cell  
383 subsets have diverse graft-versus-host-disease-preventing and antitumor effects. *Blood*, 138(10), 858-  
384 870.

385 Malhotra, N., Qi, Y., Spidale, N. A., Frascoli, M., Miu, B., Cho, O., Sylvia, K. & Kang, J. (2018)  
386 SOX4 controls invariant NKT cell differentiation by tuning TCR signaling. *J Exp Med*, 215(11),  
387 2887-2900.

388 Matsuda, J. L., Mallevaey, T., Scott-Browne, J. & Gapin, L. (2008) CD1d-restricted iNKT cells, the  
389 'Swiss-Army knife' of the immune system. *Curr Opin Immunol*, 20(3), 358-68.

390 Moretta, A., Poggi, A., Pende, D., Tripodi, G., Orengo, A. M., Pella, N., Augugliaro, R., Bottino, C.,  
391 Ciccone, E. & Moretta, L. (1991) CD69-mediated pathway of lymphocyte activation: anti-CD69  
392 monoclonal antibodies trigger the cytolytic activity of different lymphoid effector cells with the  
393 exception of cytolytic T lymphocytes expressing T cell receptor alpha/beta. *J Exp Med*, 174(6), 1393-  
394 8.

395 Nakayama, T., Kasproicz, D. J., Yamashita, M., Schubert, L. A., Gillard, G., Kimura, M.,  
396 Didierlaurent, A., Koseki, H. & Ziegler, S. F. (2002) The generation of mature, single-positive  
397 thymocytes in vivo is dysregulated by CD69 blockade or overexpression. *J Immunol*, 168(1), 87-94.

398 Papadogianni, G., Ravens, I., Dittrich-Breiholz, O., Bernhardt, G. & Georgiev, H. (2020) Impact of  
399 Aging on the Phenotype of Invariant Natural Killer T Cells in Mouse Thymus. *Front Immunol*, 11,  
400 575764.

401 Pellicci, D. G., Hammond, K. J., Uldrich, A. P., Baxter, A. G., Smyth, M. J. & Godfrey, D. I. (2002)  
402 A natural killer T (NKT) cell developmental pathway involving a thymus-dependent NK1.1(-  
403 )CD4(+) CD1d-dependent precursor stage. *J Exp Med*, 195(7), 835-44.

404 Sancho, D., Gómez, M. & Sánchez-Madrid, F. (2005) CD69 is an immunoregulatory molecule  
405 induced following activation. *Trends Immunol*, 26(3), 136-40.

- 406 Sandberg, J. K., Stoddart, C. A., Brilot, F., Jordan, K. A. & Nixon, D. F. (2004) Development of  
407 innate CD4<sup>+</sup> alpha-chain variable gene segment 24 (Valpha24) natural killer T cells in the early  
408 human fetal thymus is regulated by IL-7. *Proc Natl Acad Sci U S A*, 101(18), 7058-63.
- 409 Stuart, T., Butler, A., Hoffman, P., Hafemeister, C., Papalexi, E., Mauck, W. M., 3rd, Hao, Y.,  
410 Stoeckius, M., Smibert, P. & Satija, R. (2019) Comprehensive Integration of Single-Cell Data. *Cell*,  
411 177(7), 1888-1902.e21.
- 412 Takahashi, T., Dejbakhsh-Jones, S. & Strober, S. (2006) Expression of CD161 (NKR-P1A) defines  
413 subsets of human CD4 and CD8 T cells with different functional activities. *J Immunol*, 176(1), 211-  
414 6.
- 415 Venken, K., Jacques, P., Mortier, C., Labadia, M. E., Decruy, T., Coudenys, J., Hoyt, K., Wayne, A.  
416 L., Hughes, R., Turner, M., Van Gassen, S., Martens, L., Smith, D., Harcken, C., Wahle, J., Wang, C.  
417 T., Verheugen, E., Schryvers, N., Varkas, G., Cypers, H., Wittoek, R., Piette, Y., Gyselbrecht, L.,  
418 Van Calenbergh, S., Van den Bosch, F., Saeys, Y., Nabozny, G. & Elewaut, D. (2019) RORγt  
419 inhibition selectively targets IL-17 producing iNKT and γδ-T cells enriched in Spondyloarthritis  
420 patients. *Nat Commun*, 10(1), 9.
- 421 Wang, H. & Hogquist, K. A. (2018) CCR7 defines a precursor for murine iNKT cells in thymus and  
422 periphery. *Elife*, 7.
- 423 Watarai, H., Sekine-Kondo, E., Shigeura, T., Motomura, Y., Yasuda, T., Satoh, R., Yoshida, H.,  
424 Kubo, M., Kawamoto, H., Koseki, H. & Taniguchi, M. (2012) Development and function of invariant  
425 natural killer T cells producing T(h)2- and T(h)17-cytokines. *PLoS Biol*, 10(2), e1001255.

**FIGURE 1**

bioRxiv preprint doi: <https://doi.org/10.1101/2022.08.10.503443>; this version posted August 11, 2022. The copyright holder for this preprint (which was not certified by peer review) is the author/funder. All rights reserved. No reuse allowed without permission.

**A**

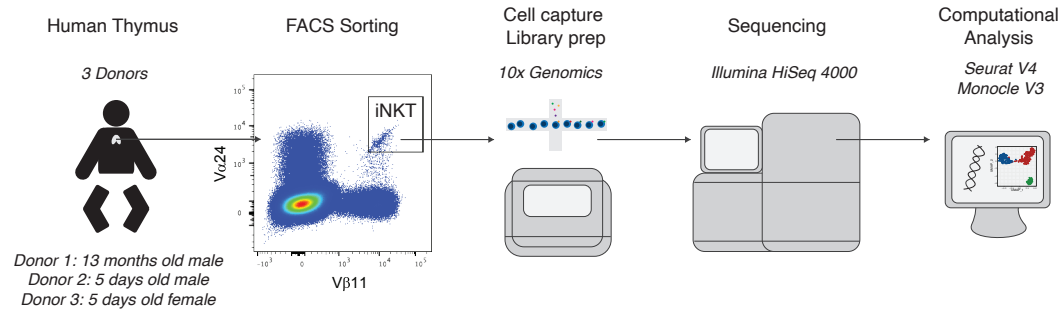

**B**

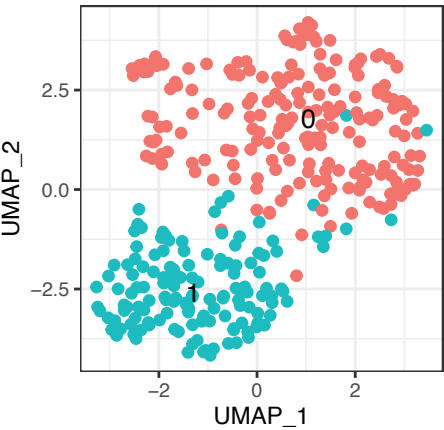

**C**

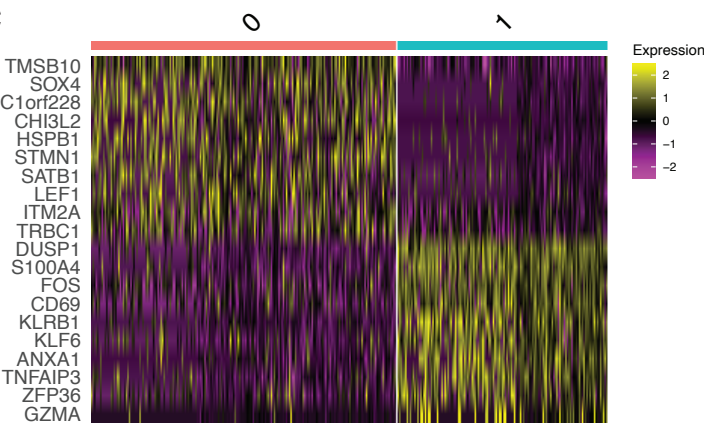

**D**

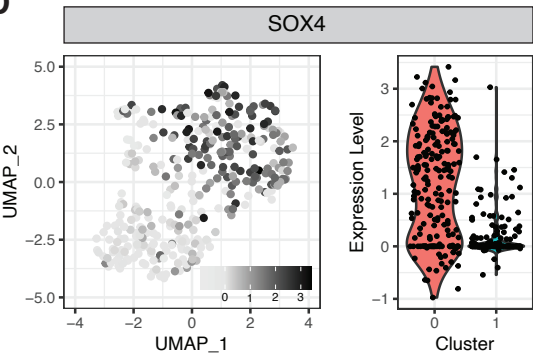

**E**

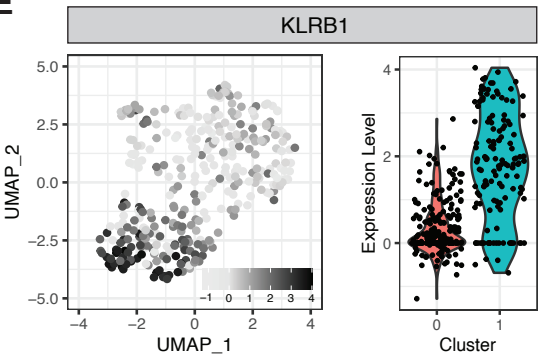

FIGURE 2

bioRxiv preprint doi: <https://doi.org/10.1101/2022.08.10.503443>; this version posted August 11, 2022. The copyright holder for this preprint (which was not certified by peer review) is the author/funder. All rights reserved. No reuse allowed without permission.

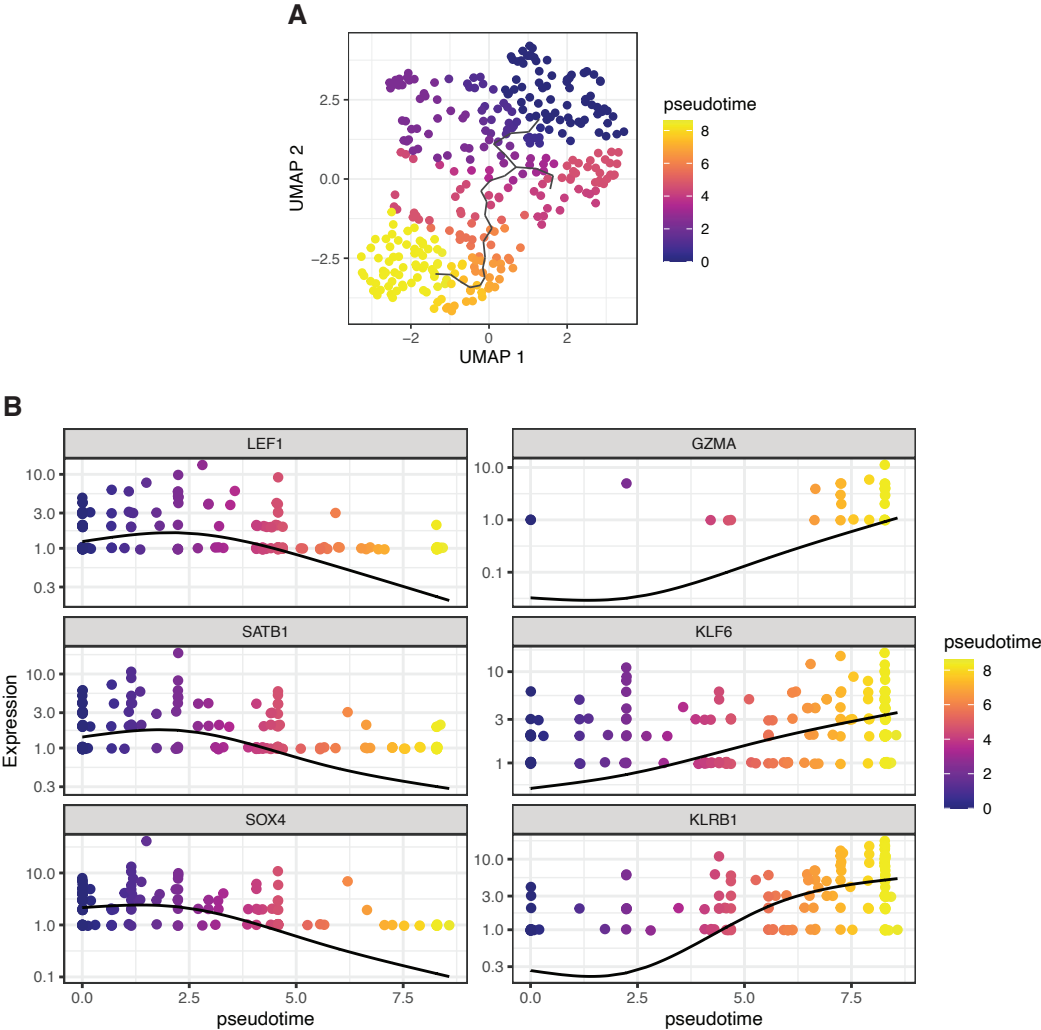

**FIGURE 3**

bioRxiv preprint doi: <https://doi.org/10.1101/2022.08.10.503443>; this version posted August 11, 2022. The copyright holder for this preprint (which was not certified by peer review) is the author/funder. All rights reserved. No reuse allowed without permission.

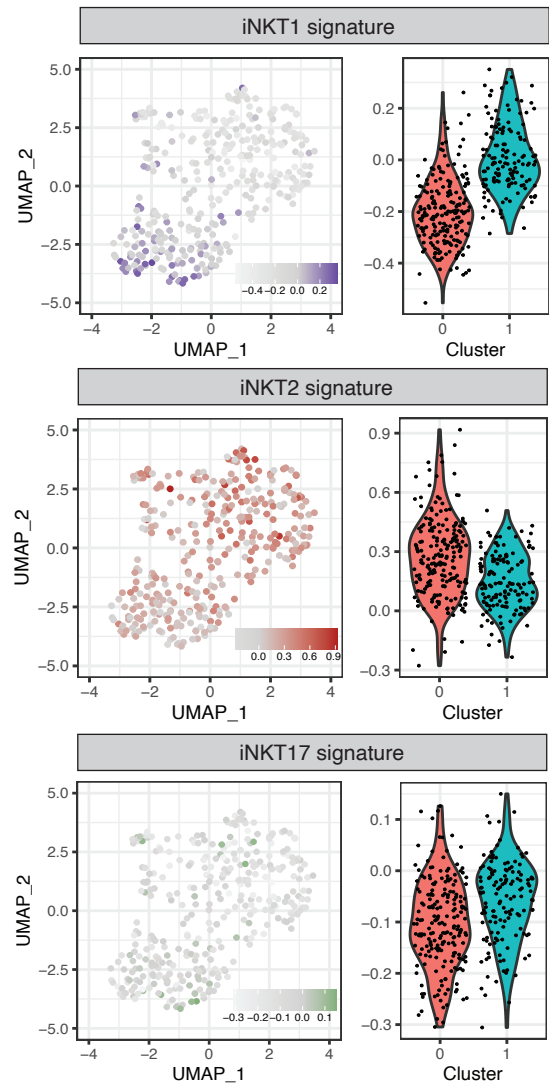

SUPPLEMENTAL FIGURE 1

bioRxiv preprint doi: <https://doi.org/10.1101/2022.08.10.503443>; this version posted August 11, 2022. The copyright holder for this preprint (which was not certified by peer review) is the author/funder. All rights reserved. No reuse allowed without permission.

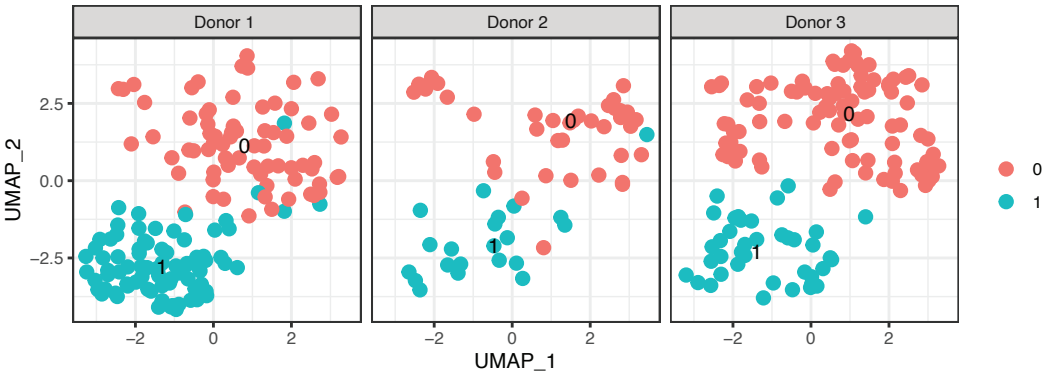



# SUPPLEMENTAL FIGURE 2

bioRxiv preprint doi: <https://doi.org/10.1101/2022.08.10.503443>; this version posted August 11, 2022. The copyright holder for this preprint (which was not certified by peer review) is the author/funder. All rights reserved. No reuse allowed without permission.

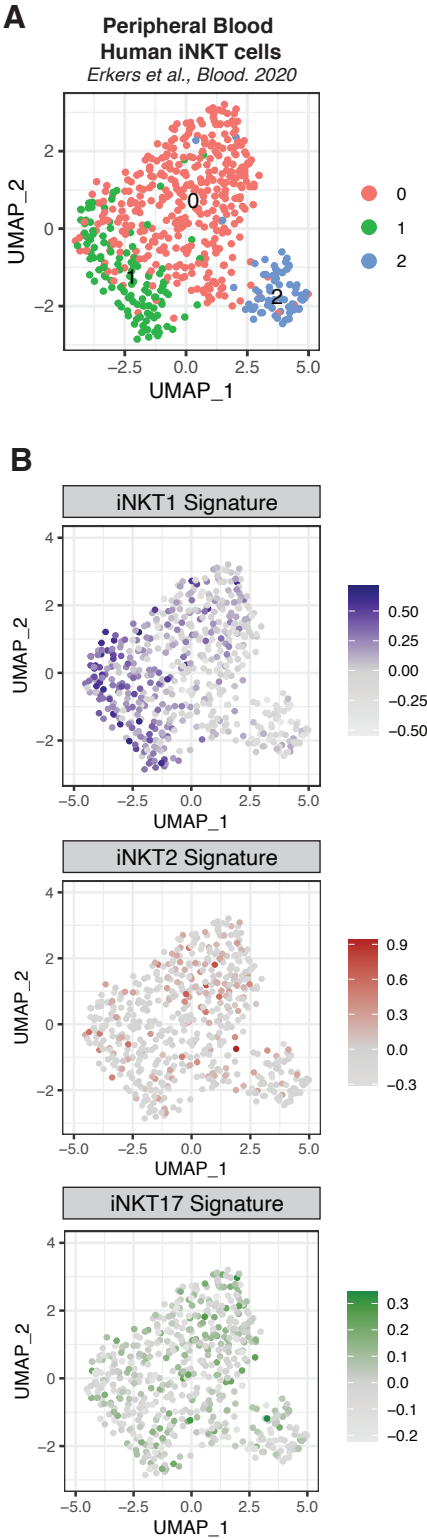

Source: http://biorxiv.org/content/10.1101/2022.08.10.503443v1.full.pdf
